# Supplementary material
Source: HighWire-hosted journal article supplement (https://bmjopen.bmj.com/content/14/1/e077693)
Supplement: inline-supplementary-material-3 [file inline-supplementary-material-3.pdf]

**አባሪ I: የመረጃ ወረቀት እና በመረጃ የተደገፈ ስምምነት**

**የመረጃ ወረቀት**

ሰላም. ስሜ \_\_\_\_\_ እባላለሁ እና ሙሉጌታ እና ሌሎች የመዳ ወላቡ ዩኒቨርሲቲ አካዳሚክ ሰራተኞች እና ተመራማሪዎች እያካሄዱት ባለዉ ጥናት ላይ መረጃ ሰብሳቢ ነኝ። “ ከስኳር በሽታ ጋር ተያያዥነት ያላቸው ችግሮች እና ተጓዳኝ ምክንያቶች ከሁለተኛው ዓይነት የስኳር ህመምተኞች መካከል በባሌ እና በምስራቅ ባሌ ዘን ሆስፒታሎች በደቡብ ምስራቅ ኢትዮጵያ ክትትል የሚደረግባቸው የጤና እክሎች መካከል ” በሚል ርዕስ ጥናት ያካሂዳል። በዚህ ጥናት ላይ ተሳትፎዎን በጣም እናደንቃለን። ቃለ መጠይቁ ለማጠናቀቅ ከ10-20 ደቂቃዎች ይወስዳል። እንደ ጥናቱ አካል፣ መጀመሪያ ሶሺዮ ዲሞኖራፊ ከዚያም ክሊኒካዊ ሁኔታዎች፣ ግላዊ ሁኔታዎች እና ከስኳር በሽታ ጋር የተያያዘ ጭንቀት (DRD) ልንጠይቅዎ እንፈልጋለን ። ምንም ይሁን ምን፣ ያቀረቡት መረጃ በጥብቅ በሚስጥር ይጠበቃል፣ እና ከተመራማሪ ቡድናችን አባላት በስተቀር ለማንም አይጋራም። በዚህ የዳሰሳ ጥናት ውስጥ መሳተፍ በፈቃደኝነት ነው፣ እና እርስዎ መመለስ የማትፈልጉት ማንኛውም ጥያቄ ብናመጣ፣ አሳውቀኝ እና ወደ ቀጣዩ ጥያቄ እሄዳለሁ። ወይም በማንኛውም ጊዜ ቃለ መጠይቁን ማቆም ይችላሉ። ሆኖም፣ የእርስዎ እይታዎች አስፈላጊ ስለሆኑ በዳሰሳ ጥናቱ ላይ እንደሚሳተፉ ተስፋ እናደርጋለን።

**በዚህ ጊዜ ስለ ዳሰሳ ጥናቱ የሆነ ነገር ልትጠይቁኝ ትፈልጋለሁ?**

**ቃለ መጠይቁን አሁን ልጀምር?**

**የቃለ-መጠይቅ አድራጊ ፊርማ፡----- ቀን፡-----**

ምላሽ ሰጪው ለመጠየቅ ተስማምቷል - ቃለ መጠይቅ

ምላሽ ሰጪው ለመጠየቅ አይስማማም - መጨረሻ

**ለበለጠ መረጃ እና ጥያቄዎች የዋናው መርማሪ አድራሻ እዚህ አለ።**

**ሙሉጌታ አዲኛው (BSc፣ MSc)**

**ስልክ፡ +251931821570**

**ኢሜል ፡ mulugetaaadugnew@gmail.com**

**የፍቃድ ቅፅ**

“ ከስኳር በሽታ ጋር የተያያዘ ችግር እና ተያያዥ ምክንያቶች ከሁለተኛው ዓይነት የስኳር ህመምተኞች ክትትል በባሌ እና ምስራቅ ባሌ ዞን ሆስፒታሎች፣ ደቡብ ምስራቅ ኢትዮጵያ ስለሚካሄደው ጥናት መረጃ ተሰጥቻለሁ። በዚህ ጥናት ውስጥ መሳተፍ በፈቃደኝነት ነው፣ ለማንኛውም ጠያቂ መልስ የመስጠት ግዴታ የለበትም፣ ለጥያቄዎች መልስ ባለመስጠት ምንም ጉዳት የለውም እና ለጥያቄው መልስ በመስጠት የተለየ ጥቅም የለም፣ እንዲሁም ቃለ-መጠይቁ ከ10-20 ደቂቃዎች ይወስዳል። ከላይ የተጠቀሱትን መረጃዎች ሁሉ ሰማሁ እና በቃለ መጠይቁ ላይ ለመሳተፍ ፈቃደኛ ነኝ።

**የጠያቂው ስም \_\_\_\_\_ ፊርማ \_\_\_\_\_**

(የጠያቂው ፊርማ ምላሽ ሰጪው በመረጃ የተደገፈ ስምምነት በቃላት መስጠቱን የሚያረጋግጥ)

**የአማርኛ ትርጉም መጠይቅ**

**ክፍል አንድ: የቤተሰብ አጠቃላይ ማህበራዊ ሁኔታ**

**መመሪያ 1:** ይህ ጥያቄ ስለ ዳራ መረጃ ነው። እባክዎን እያንዳንዱን የአረፍተ ነገር ንጥል ለእርስዎ የማንብለዎትን በጥሞና ያዳምጡ እና ከዚያ ምላሹን እና የወቅቱን ተገቢ መልስ የሚወክል አማራጭ ይንገሩኝ።

1. የተሳታፊ ኮድ ቁጥር:- \_\_\_\_\_

**ክፍል አንድ:- ማህበረ-ሕዝብ ባህሪያት**

| ተ.ቁ | ጥያቄ        | ምላሽ                                                                                                           | አስተያየት |
|-----|------------|---------------------------------------------------------------------------------------------------------------|--------|
| 101 | እድሜ        | _____                                                                                                         |        |
| 102 | ጾታ         | 1. ወንድ<br>2. ሴት                                                                                               |        |
| 103 | የጋብቻ ሁኔታ   | 1. ያለገባ/ች<br>2. ያላገባ/ች<br>3. አግባብ የፈታ/ች<br>4. የሞተበት/የሞተባት                                                     |        |
| 104 | መኖሪያ ቦታ    | 1. ከተማ<br>2. ገጠር                                                                                              |        |
| 105 | የትምህርት ደረጃ | 1. መደበኛ ትምህርት የለም<br>2. የመጀመሪያ ደረጃ (1-8)<br>3. ሁለተኛ ደረጃ (9-12)<br>4. ዲፕሎማ<br>5. ዲግሪ እና ከዚያ በላይ                |        |
| 106 | የታካሚ ሥራ    | 1. ሥራ አጥ<br>2. ጡረታ ወጥቷል።<br>3. ተቀጠረ<br>4. የቤት ሚስት<br>5. ነጋዴ<br>6. ዕለታዊ የጉልበት ሥራ<br>7. ገበሬ<br>8. ተማሪ<br>9. ሌሎች |        |

**ክፍል II: ክሊኒካዊ ተዛማጅ ታሪክ**

| ተ.ቁ | ጥያቄዎች                                   | ምላሽ                                                                            |                       |
|-----|-----------------------------------------|--------------------------------------------------------------------------------|-----------------------|
| 201 | የስኳር በሽታ እንዳለበዎት ካወቁ ምን ያህል ጊዜ ሆነዎት     | _____ ዓመታት                                                                     |                       |
| 202 | ሌላ ተጓዳኝ በሽታ አለበዎት                       | 1. አዎ<br>2. አይ<br>3. አላውቅም                                                     | አይ ከሆነ ወደ ጥያቄ 204 ይሂዱ |
| 203 | ለ Q No 202 አዎ ካሉዎት የትኞቹ ተጓዳኝ በሽታዎች አሉዎት | 1. የደም ግፊት<br>2. የነርቭ ችግር<br>3. የኩላሊት በሽታ<br>4. የልብ ችግር<br>5. ሌላ (ይግለጹ) _____. |                       |
| 204 | አሁን የሚወስዱት ሕክምናዎች                       | 1. የኢንሱሊን መርፌ<br>2. በአፍ የሚወሰድ<br>3. ሁለቱም<br>4. የህይወት ዘይቤ ማሻሻያ                  |                       |
| 205 | ባለፉት 3 ወራት ውስጥ የደም ስኩር ማነስ ክስተት         | 1. አዎ<br>2. አይ                                                                 |                       |
| 206 | ከስኳር በሽታ ጋር የተያያዘ ትምህርት ተከታትለዋል?        | 1. አዎ<br>2. አይ                                                                 |                       |

**ክፍል III: የግል ምክንያቶች**

|     |                                                      |                                                                           |                  |
|-----|------------------------------------------------------|---------------------------------------------------------------------------|------------------|
| 301 | መደበኛ የአካል ብቃት እንቅስቃሴ ያደርጋሉ?                          | 1. አዎ<br>2. አይ                                                            |                  |
| 302 | በጣም የሚቀርቡዎት እና በችግር ጊዜ የሚደርሱለዎ ሰዎች ስንት ይሆናሉ?         | 1. " ምንም "<br>2. ' 1-2 '<br>3. ' 3 - 5 '<br>4. ' 5+                       |                  |
| 303 | ሰዎች በምታደርገው ነገር ምን ያህል ፍላጎት እና አሳቢነት ያሳያሉ?           | 1 " ምንም "<br>2 " ትንሽ "<br>3 " ያልተረጋገጠ "<br>4 ' አንዳንድ '<br>5 " ብዙ "        |                  |
| 304 | ከጎረቤቶቻችዎ እርዳታ በሚፈሉኑበት ሰዓት የማግኘት አጋጣሚ?                | 1 " በጣም አስቸጋሪ "<br>2 " አስቸጋሪ "<br>3" ይቻላል "<br>4 " ቀላል "<br>5 ' በጣም ቀላል ' |                  |
| 305 | ባለፈው አንድ አመት ውስጥ አልኮል ጠጥተዋል?                         | 1. አዎ<br>2. አይ                                                            | ካልሆነ ወደ Q307 ይሂዱ |
| 306 | ምን ያህል ጊዜ አልኮል ትጠጣሉ?                                 | 1. በወር እስከ 4 ጊዜ<br>2. በሳምንት ከ 4 ጊዜ በላይ                                    |                  |
| 307 | ላለፉት ሰባት ቀናት ሲጋራ አጨስሃል - አንድም ጥፍ - ባለፉት ሰባት ቀናት ውስጥ? | 1. አዎ<br>2. አይ                                                            |                  |

**ክፍል IV: ከስኳር በሽታ ጋር የተዛመዱ ጥያቄዎች (DRD)**

**መመሪያዎች** :- ከስኳር በሽታ ጋር መኖር አንዳንድ ጊዜ ከባድ ሊሆን ይችላል። የስኳር በሽታን በተመለከተ ብዙ ችግሮች ሊኖሩ ይችላሉ እና በክብደታቸው በጣም ሊለያዩ ይችላሉ። ችግሮች ከትንሽ ጣጣዎች እስከ ዋና የህይወት ችግሮች ሊደርሱ ይችላሉ። ከዚህ በታች የተዘረዘሩት 17 የስኳር በሽታ ያለባቸው ሰዎች ሊያጋጥሟቸው የሚችሉ ችግሮች ናቸው። ባለፈው ወር ውስጥ እያንዳንዱ መጠይቅ ምን ያህል እንዳስጨነቀዎት ግምት ውስጥ ያስገቡ እና ተገቢውን ቁጥር ይናገሩ ። እባኩትን እየጠየቅንዎት ያለው መጠይቅ ለእርስዎ ብቻ እውነት መሆን አለመሆኑን ሳይሆን እያንዳንዱ ነገር በህይወቶ የሚያስጨንቁዎትን ደረጃ እንዲጠቁሙ ነው። አንድ የተወሰነ ነገር ለእርስዎ የማይረብሽ ወይም ችግር እንደሌለው ከተሰማዎት “1”ን ይናገራሉ ። ለእርስዎ በጣም የሚረብሽ ከሆነ “6”ን መናገር ይችላሉ።

| ችግሮች                                                                | ችግር አይሆንም | ትንሽ ችግር | መካከለኛ ችግር | በመጠኑ ከባድ ችግር | ከባድ ችግር | በጣም ከባድ ችግር |
|---------------------------------------------------------------------|-----------|---------|-----------|--------------|---------|-------------|
| <b>ስሜታዊ ሽክም (ED)</b>                                                |           |         |           |              |         |             |
| 1. የስኳር ህመም በየቀኑ ከመጠን በላይ የአዕምሮ እና የአካል ኃይሉን እየወሰደ እንደሆነ ይሰማኛል።     | 1         | 2       | 3         | 4            | 5       | 6           |
| 2. ከስኳር በሽታ ጋር ስለመኖር ሳስብ ንዴት፣ ፍርሃት እና/ወይም የመንፈስ ጭንቀት ይሰማኛል።         | 1         | 2       | 3         | 4            | 5       | 6           |
| 3 የስኳር ህመም ህይወቴን እንደሚቆጣጠረው ይሰማኛል።                                   | 1         | 2       | 3         | 4            | 5       | 6           |
| 4. ምንም ባደርግ በከባድ የረጅም ጊዜ ውስብስቦች እንደምጩርስ ይሰማኛል።                      | 1         | 2       | 3         | 4            | 5       | 6           |
| 5 ከስኳር በሽታ ጋር የመኖር ፍላጎቶች ከመጠን በላይ የመጨናነቅ ስሜት።                       | 1         | 2       | 3         | 4            | 5       | 6           |
| <b>ከሐኪም ጋር የተያያዘ ጭንቀት (PD)</b>                                      |           |         |           |              |         |             |
| 6. ዶክተራ ስለ ስኳር በሽታ እና ስለ ስኳር በሽታ እንክብካቤ በቂ እውቀት እንደሌለው ይሰማኛል.       | 1         | 2       | 3         | 4            | 5       | 6           |
| 7. ዶክተራ የስኳር በሽታዬን እንዴት መቆጣጠር እንዳለብኝ በቂ መመሪያዎችን እንደማይሰጠኝ እየተሰማኝ ነው። | 1         | 2       | 3         | 4            | 5       | 6           |
| 8. ዶክተራ ጭንቀቴን በበቂ ሁኔታ እንደማይመለከተው ይሰማኛል።                             | 1         | 2       | 3         | 4            | 5       | 6           |

|                                                                                                                         |   |   |   |   |   |   |
|-------------------------------------------------------------------------------------------------------------------------|---|---|---|---|---|---|
| 9. ስለ የስኳር ህመም አዘውትሬ የማየው ዶክተር የላኝም የሚል ስሜት ይሰማኛል።                                                                      | 1 | 2 | 3 | 4 | 5 | 6 |
| <b>ከአገዛዝ ጋር የተያያዘ ጭንቀት (RD)</b>                                                                                         |   |   |   |   |   |   |
| 10. በደም ውስጥ ያለውን የስኳር መጠን በተደጋጋሚ በበቂ ሁኔታ እየመረመርኩ እንዳልሆነ ይሰማኛል።                                                          | 1 | 2 | 3 | 4 | 5 | 6 |
| 11. በስኳር በሽታን በሚደረጉ ድርጊቶች ላይ ብዙ ጊዜ እየወድቅኩ እንደሆነ ይሰማኛል.                                                                  | 1 | 2 | 3 | 4 | 5 | 6 |
| 12 የስኳር በሽታን ለመቆጣጠር በዕለት ተዕለት ችሎታዬ በራስ የመተማመን ስሜት አይሰማኝም።                                                               | 1 | 2 | 3 | 4 | 5 | 6 |
| 13. ከጥሩ የምግብ እቅድ ጋር በበቂ ሁኔታ እየሄድኩ እንዳልሆነ ይሰማኛል።                                                                         | 1 | 2 | 3 | 4 | 5 | 6 |
| 14. የስኳር በሽታዬን እየተንከባከብኩ ለመቀጠል ያለመነሳሳት ስሜት.                                                                             | 1 | 2 | 3 | 4 | 5 | 6 |
| <b>የእርስ በእርስ ጭንቀት (ID)</b>                                                                                              |   |   |   |   |   |   |
| 15. ጓደኞቼ ወይም ቤተሰቦቼ ለራሴ እንክብካቤ ጥረቱ በቂ ድጋፍ እንደማይሰጡኝ ይሰማኛል (ለምሳሌ ከፕሮግራሜ ጋር የሚቃረኑ ተግባራትን ማቀድ፣ “የተሳሳቱ” ምግቦችን እንድንበላ ማበረታታት)። | 1 | 2 | 3 | 4 | 5 | 6 |
| 16. ጓደኞቼ ወይም ቤተሰብ ከስኳር በሽታ ጋር መኖር ምን ያህል ከባድ እንደሆነ እንደማያደገቁ ይሰማኛል.                                                      | 1 | 2 | 3 | 4 | 5 | 6 |
| 17. ጓደኞቼ ወይም ቤተሰቦች የምፈልገውን ስሜታዊ ድጋፍ እንደማይሰጡኝ ይሰማኛል።                                                                     | 1 | 2 | 3 | 4 | 5 | 6 |
